# Supplementary material
Source: publisher site journal article supplement (https://e-cmh.org/upload/media/cmh-2023-0506-Supplementary-Figure-4.pdf)
Supplement: Supplementary file 1 [file cmh-2023-0506-Supplementary-Figure-4.pdf]

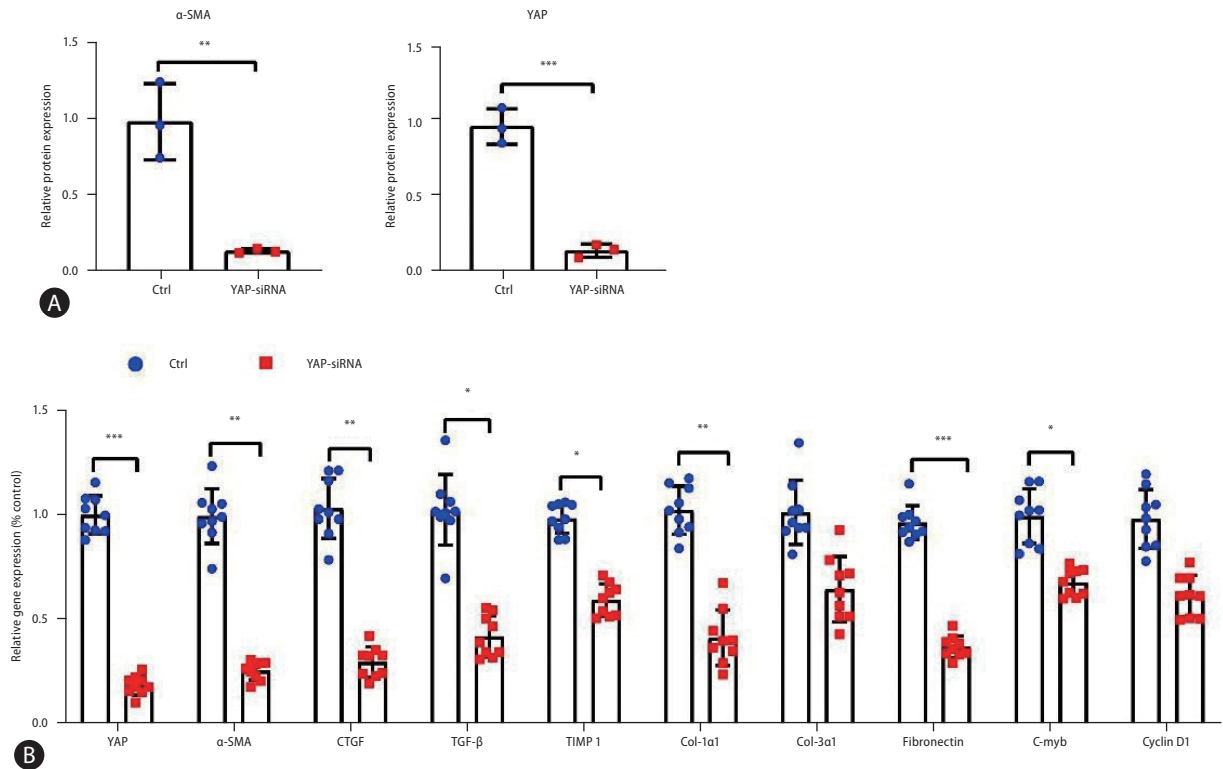

**Supplementary Figure 4.** Inhibition of YAP blocked HSC activation *in vitro*. (A) The semi-quantitative determination of YAP and  $\alpha$ -SMA protein expression (n=3).  $\beta$ -Actin was used as a loading control. (B) mRNA levels of fibrosis-related genes like  $\alpha$ -SMA, YAP, TGF- $\beta$ , TIMP-1, CTGF, COL-1a1, COL-3a1, C-MYB, etc. in immortalized LX2 cells transfected with the siRNA against human YAP gene were quantified by qRT-PCR (n=3). The experiment was repeated at least 3 times. All data were expressed as mean  $\pm$  SD. \*\*\*\*\*, P < 0.05, 0.01, and 0.001 compared to Ctrl-DMEM or Ctrl-siRNA.
